# Supplementary material for: Flooded by jargon: how the interpretation of water-related terms differs between hydrology experts and the general audience
Source: Copernicus journal article supplement (doi:10.5194/hess-23-393-2019), 2019-01-22
Supplement: Supplementary file 1 [file hess-23-393-2019-supplement.pdf]

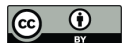

## *Supplement of*

# **Flooded by jargon: how the interpretation of water-related terms differs between hydrology experts and the general audience**

**Gemma J. Venhuizen et al.**

*Correspondence to:* Rolf Hut ([r.w.hut@tudelft.nl](mailto:r.w.hut@tudelft.nl))

The copyright of individual parts of the supplement might differ from the CC BY 4.0 License.

# Questionnaire hydrological terms

Thank you for participating in this survey! We will ask you some questions about water and terminology. We are not looking for a 'right' answer, but for the answer that is, in your opinion, the best definition.

It will take approx. 5 minutes to participate. Have fun!

## 1. What is, in your opinion, the best definition of a river?

- ☐ A: Path of fresh water flowing into the ocean
- ☐ B: Water flowing only on the surface of the land and never underground
- ☐ C: Large stream which serves as the natural drainage for a basin
- ☐ D: Flow of surface water within a straight channel

## 2. What is, in your opinion, the best definition of a river basin?

- ☐ A: Area having a common outlet for its surface runoff
- ☐ B: Dry river channel which may be flooded during high water events
- ☐ C: Catchment which a river flows into
- ☐ D: Body of water (lake, sea, ocean) a river flows into

## 3. What is, in your opinion, the best definition of groundwater?

- ☐ A: All water stored in the ground
- ☐ B: All water which is in direct contact with the ground
- ☐ C: Water flowing under ground
- ☐ D: Subsurface water occupying the saturated zone

## 4. What is, in your opinion, the best definition of an aquifer?

- ☐ A: Subsurface water body
- ☐ B: Groundwater that reaches the surface through a permeable rock layer
- ☐ C: Geological formation capable of storing, transmitting and yielding water
- ☐ D: Man-made structure first built by the Romans to transport water

## 5. What is, in your opinion, the best definition of a lake?

- ☐ A: Man-made body of standing surface water of significant extent
- ☐ B: Inland body of standing surface water of significant extent
- ☐ C: Small body of water encompassed by high mountains
- ☐ D: Area of variable size filled with water

6. What is, in your opinion, the best definition of a dam?

- ☐ A: Barrier constructed across a valley to store water or raise the water level
- ☐ B: Barrier that prevents a river to flow into a lake
- ☐ C: Man-made, giant concrete structure to regulate water flow
- ☐ D: Man-made object to keep rivers or seas from overflowing land

7. What is, in your opinion, the best definition of a delta?

- ☐ A: Feature resulting from an alluvial deposit at a rivermouth
- ☐ B: River mouth that spreads out a little bit, like the shape of a Greek letter Delta
- ☐ C: Triangular shaped island in a river
- ☐ D: Landform that forms from deposition of sediment carried by a river

8. What is, in your opinion, the best definition of downstream?

- ☐ A: Heavy intensity rain water falling down
- ☐ B: Direction from which a fluid is moving
- ☐ C: Stream that branches off from the main stream
- ☐ D: Direction in which a fluid is moving

9. What is, in your opinion, the best definition of a flood?

- ☐ A: Large wave of moving water
- ☐ B: Overflow of water onto lands that are not normally covered by water
- ☐ C: Rise in the water level to a peak from which it recedes at a slower rate
- ☐ D: Unusually large run-off event that leads to economic damage

10. What is, in your opinion, the best definition of a stream?

- ☐ A: River that drains into another river and not into a lake, sea or ocean
- ☐ B: Watercourse that flows into a larger watercourse or into a lake
- ☐ C: Small river with water moving fast enough to be visible with the naked eye
- ☐ D: General term for any body of flowing water

11. What is, in your opinion, the best definition of discharge?

- ☐ A: Volume of water that passes through the whole river in one day
- ☐ B: Volume of water flowing through a river cross-section per unit time
- ☐ C: Water with enough sediment in it to limit visibility to less than 1 feet
- ☐ D: Flowing water in a reservoir used to generate electricity

12. What is, in your opinion, the best definition of a water table?

- ☐ A: Top surface of the zone of saturation
- ☐ B: Saturated part of an aquifer
- ☐ C: Tide table kept at water authority
- ☐ D: Height to which water raises in a well

13. Which of the following photos is, in your opinion, the best depiction of a geyser?

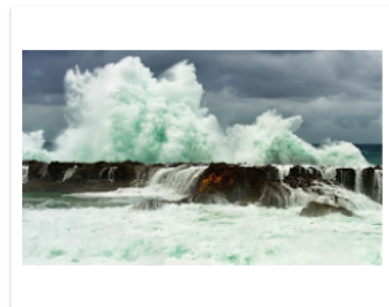

☐ A:

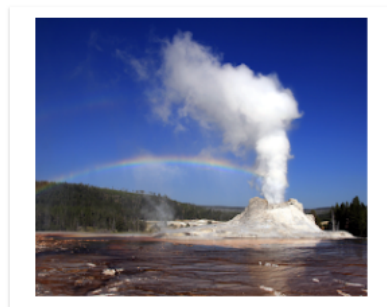

☐ B:

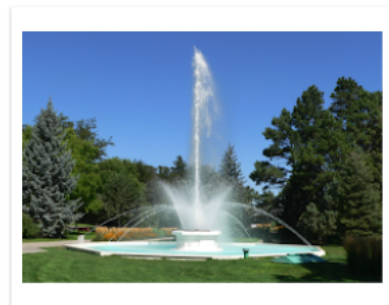

☐ C:

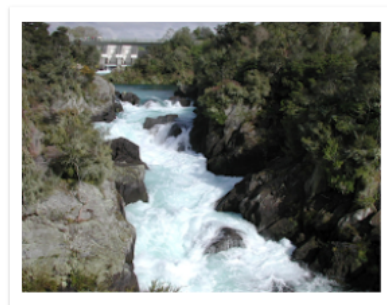

☐ D:

14. Which of the following photos is, in your opinion, the best depiction of a sewer?

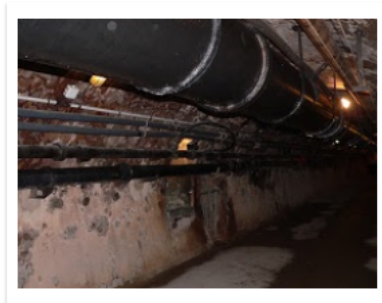

☐ A:

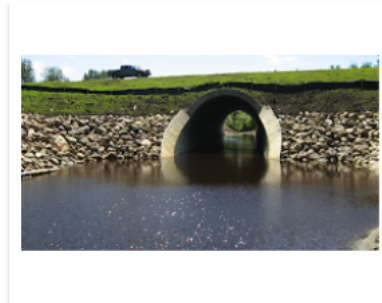

☐ B:

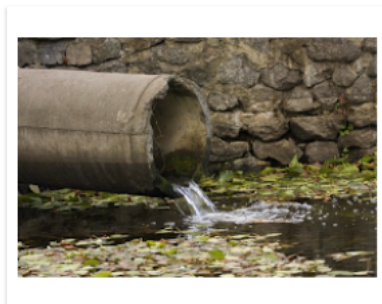

☐ C:

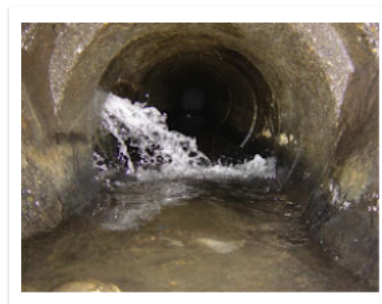

☐ D:

15. Which of the following photos is, in your opinion, the best depiction of a flood?

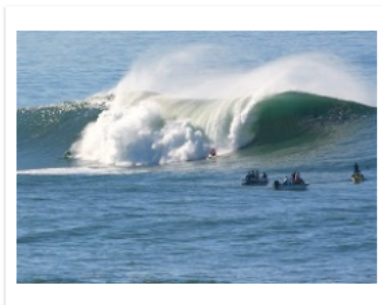

☐ A:

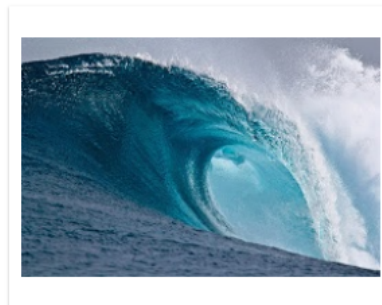

☐ B:

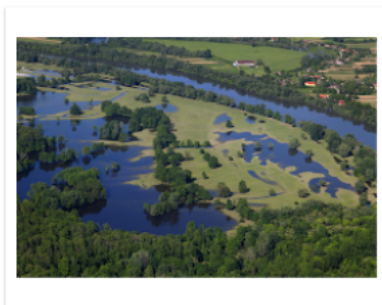

☐ C:

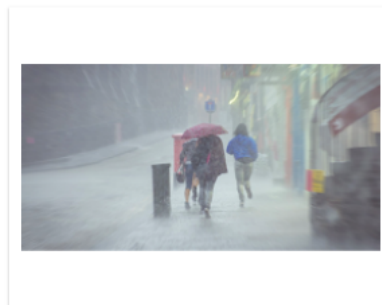

☐ D:

16. Which of the following photos is, in your opinion, the best depiction of a pond?

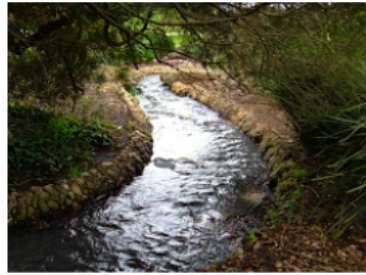

☐ A:

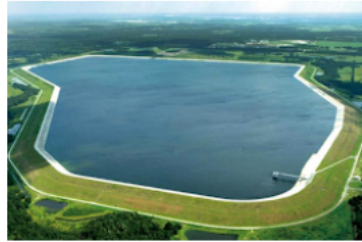

☐ B:

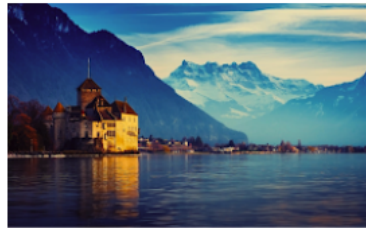

☐ C:

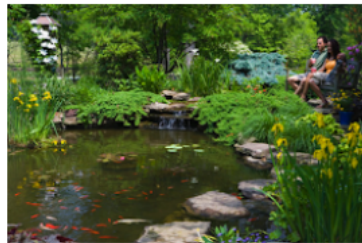

☐ D:

17. Which of the following photos is, in your opinion, the best depiction of a swamp?

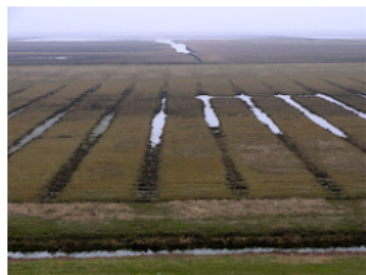

☐ A:

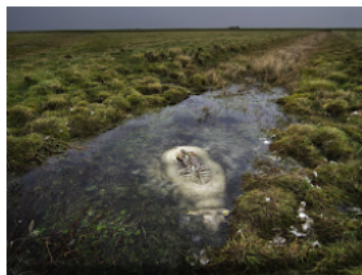

☐ B:

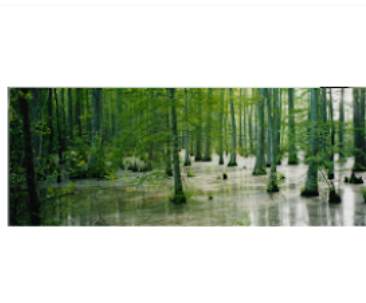

☐ C:

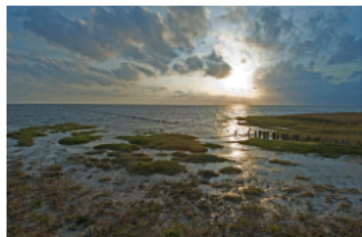

☐ D:



18. Which of the following photos is, in your opinion, the best depiction of hydro power?

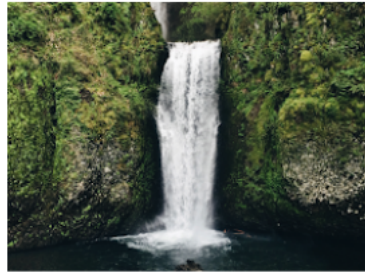

☐ A:

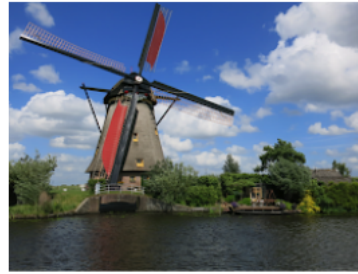

☐ B:

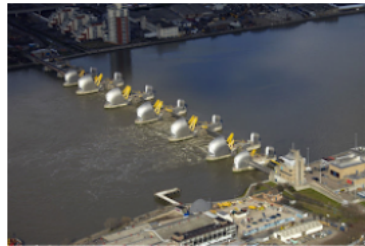

☐ C:

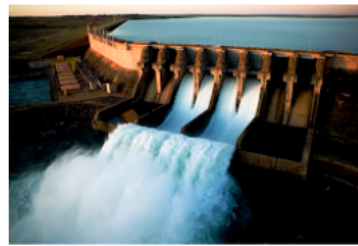

☐ D:

19. Which of the following photos is, in your opinion, the best depiction of a reservoir?

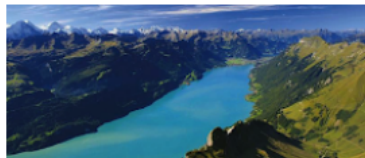

☐ A:

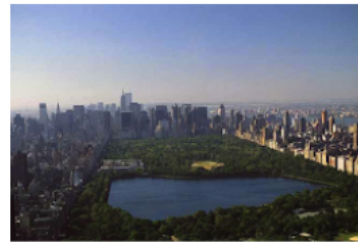

☐ B:

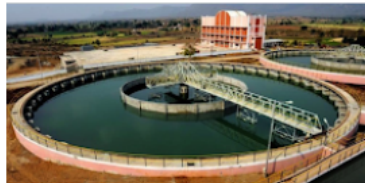

☐ C:

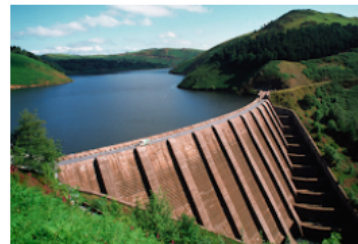

☐ D:

20. Which of the following photos is, in your opinion, the best depiction of a dike?

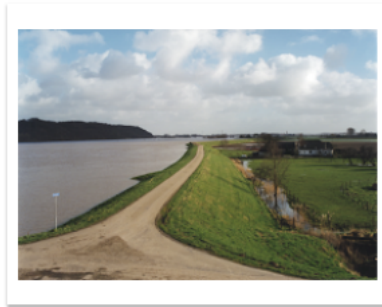

☐ A:

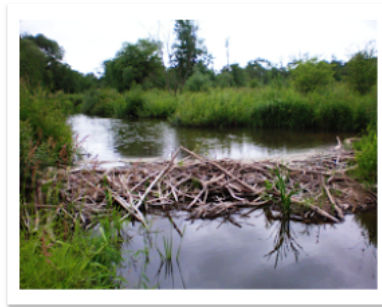

☐ B:

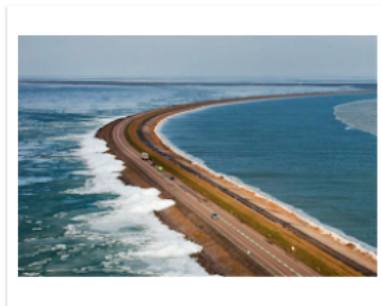

☐ C:

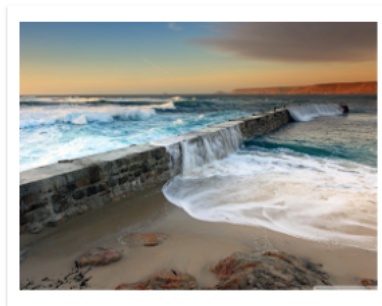

☐ D:

21. Which of the following photos is, in your opinion, the best depiction of a river?

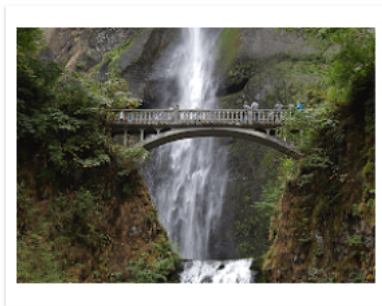

☐ A:

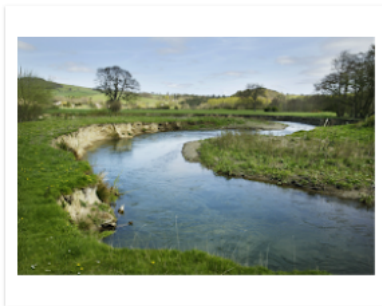

☐ B:

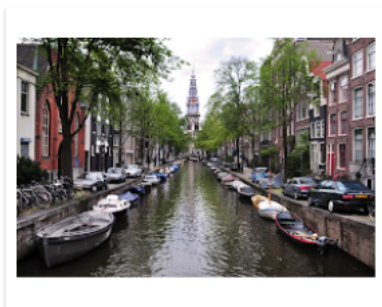

☐ C:

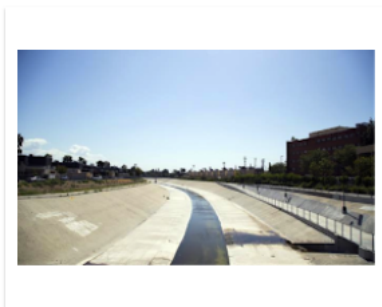

☐ D:



22. Which of the following photos is, in your opinion, the best depiction of dew?

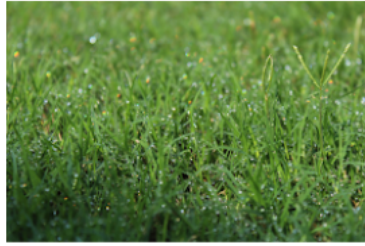

☐ A:

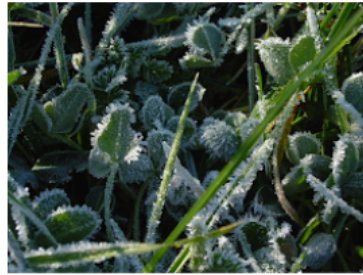

☐ B:

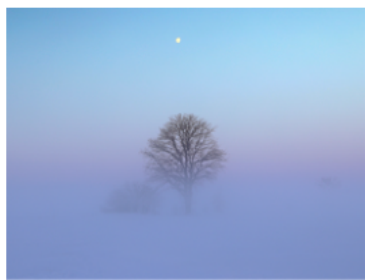

☐ C:

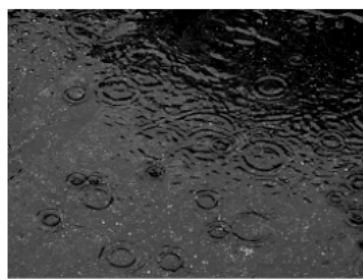

☐ D:

23. Do you have any comments concerning the questions?

Your answer

---

24. What is your gender?

- ☐ Female
- ☐ Male
- ☐ Other or prefer not to say

25. What is your age?

Your answer

---

26. What is your country and postcode area?

Your answer

---

27. What is your highest completed education level?

Your answer

---
